# Supplementary material for: Effects of New Btk-Based Formulations BLB1 and Lip on Aquatic Non-Target Organisms
Source: MDPI journal article supplement (doi:10.3390/biology13100824), 2024-10-14
Supplement: s1 [file biology-3134317-supplementary.pdf › biology-3134317-supplementary.pdf]

**Table S1.** Endotoxin concentrations based on Bradford assay

| Btk-biopesticide | Endotoxin concentrations            |
|------------------|-------------------------------------|
| BLB1             | 1992,941 $\mu\text{g}/100\text{mg}$ |
| Lip              | 1500,784 $\mu\text{g}/100\text{mg}$ |
| Delphin          | 7045,882 $\mu\text{g}/100\text{mg}$ |

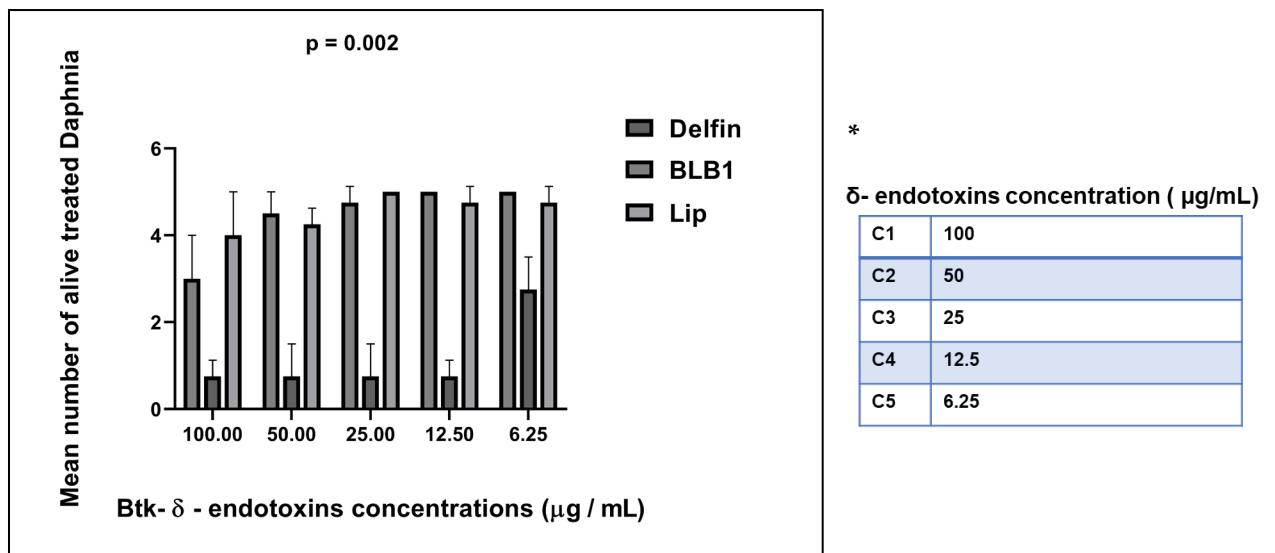

**Figure S.1.** Viability of the treated *D. magna* after exposition to the various Btk-biopesticides, tested at different  $\delta$  - endotoxins concentrations (Endpoint assessment at 48 h of alive treated Daphnia). Data expressed relative to mean value. Bars represent the mean  $\pm$  SE. The significance has been assessed using one-way ANOVA with Tukey test.

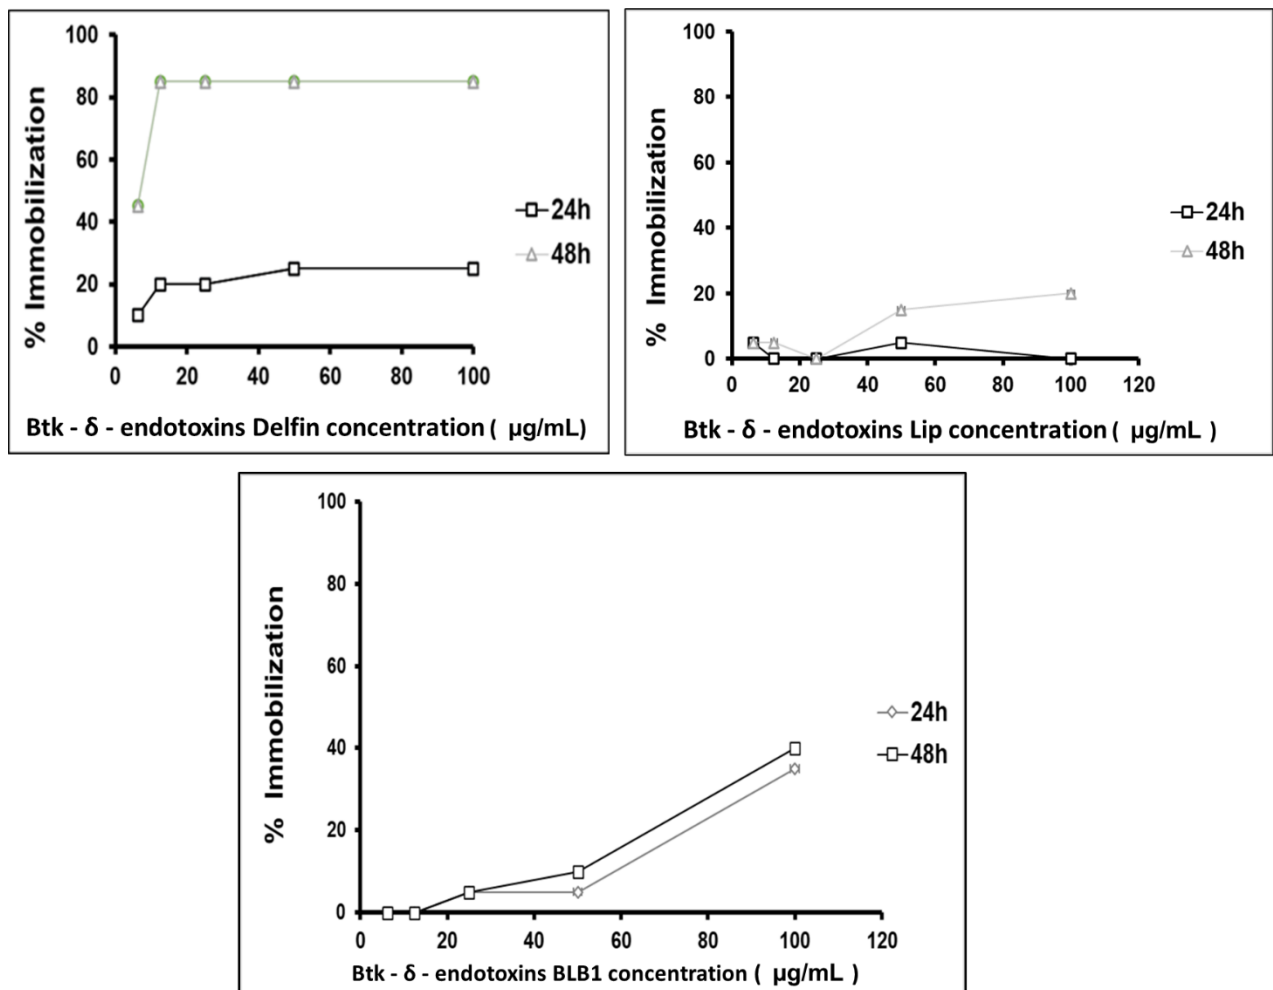

**Figure.S2.** Immobilization rate of *D. magna* exposed to the various Btk-biopesticides, tested at different  $\delta$  - endotoxins concentration.

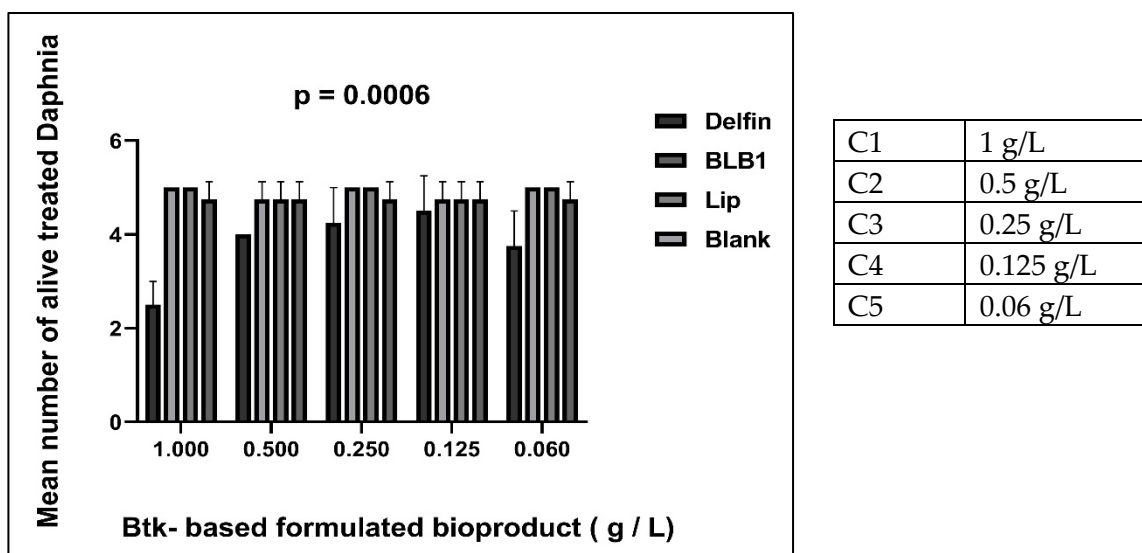

**Figure S.3.** Viability of the treated *D. magna* after exposition to various Btk-biopesticides formulated whole products, tested at different concentrations (Endpoint assessment at 48 h of alive treated Daphnia). Data expressed relative to mean value. Bars represent the mean  $\pm$  SE. The significance has been assessed using one-way ANOVA with Dunett test.
